# Supplementary material for: MS-qFRET: A quantum dot-based method for analysis of DNA methylation
Source: HighWire-hosted journal article supplement (doi:10.1101/gr.088831.108), 2009-05-14
Supplement: Bailey_Supplementary_Table_1.docx [file Bailey_Supplementary_Table_1.docx]

| **Donor/ Max Emission** | **Acceptor/ Max. Excitation** | **Ro** |
| --- | --- | --- |
| QD605/ 605nm | Cy5/ 652nm | 69.4 Å |
| QD585/ 585nm | Alexa594/ 594nm | 54.3 Å |
| QD585/ 585nm | Cy5/ 652nm | 59.2 Å |

**Supplementary Table 1**

**Supplementary Table 1.** Förster distance calculations. The FRET pairs used include combinations of a QD donor (QD585 or QD605) and an acceptor (Alexa594 or Cy5). The Förster distance (*Ro*) is calculated using the Förster formalism ,where is the orientation factor (2/3 for randomly oriented dipoles), is the quantum yield of QD585 (~0.2) and QD605 (~ 0.6) (Invitrogen Corporation); is the Avogadro’s number, is the refractive index of the medium (1.4 for biomolecules in aqueous solution); I is the normalized overlap integral and is calculated using where is the normalized donor emission spectra and is the acceptor absorption spectra and is expressed as an extinction coefficient. For the 2 organic fluorophores we used, for Alexa594 and = 250,000 for Cy5.
