# Supplementary material for: MS-qFRET: A quantum dot-based method for analysis of DNA methylation
Source: HighWire-hosted journal article supplement (doi:10.1101/gr.088831.108), 2009-05-14
Supplement: Bailey_Supplementary_Table_2.docx [file Bailey_Supplementary_Table_2.docx]

|  | **Tm of *CDKN2a* products** | |
| --- | --- | --- |
|  | ***MS-qFRET*** | ***Standard MSP*** |
| **M** | 83.4 | 84.2 |
| **U** | 76.2 | 77.6 |

**Supplementary Table 2**

**Supplementary Table 2.** Determination of specificity of primers to differentiate between M and U products. Since specificity of MSP primers have been previously demonstrated for MSP by sequencing of products, by restriction analysis of MSP products, or by meltcurve analysis of MSP products, we have included an analysis of U and M MS-qFRET products and confirm that this approach remains specific for unmethylated or methylated amplification. The results above are average Tm values from 3 different *CDKN2a* M and U reactions that have been generated using 50 ng IVD and 50 ng NL as input DNA. As observed, clear differences in Tm for M and U are observed. We compared these Tm values with those from regular unlabeled MSP primers and the values were comparable. This demonstrates that labeling the primers with biotin and a fluorophore does not limit specificity of the reaction.
