# Supplementary material for: MS-qFRET: A quantum dot-based method for analysis of DNA methylation
Source: HighWire-hosted journal article supplement (doi:10.1101/gr.088831.108), 2009-05-14
Supplement: Binder1.pdf [file Binder1.pdf]

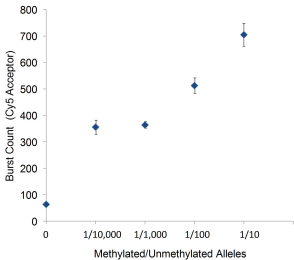

**Bailey\_Supplementary Figure 1**

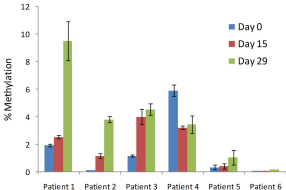

Bailey\_Supplementary Figure 2

A

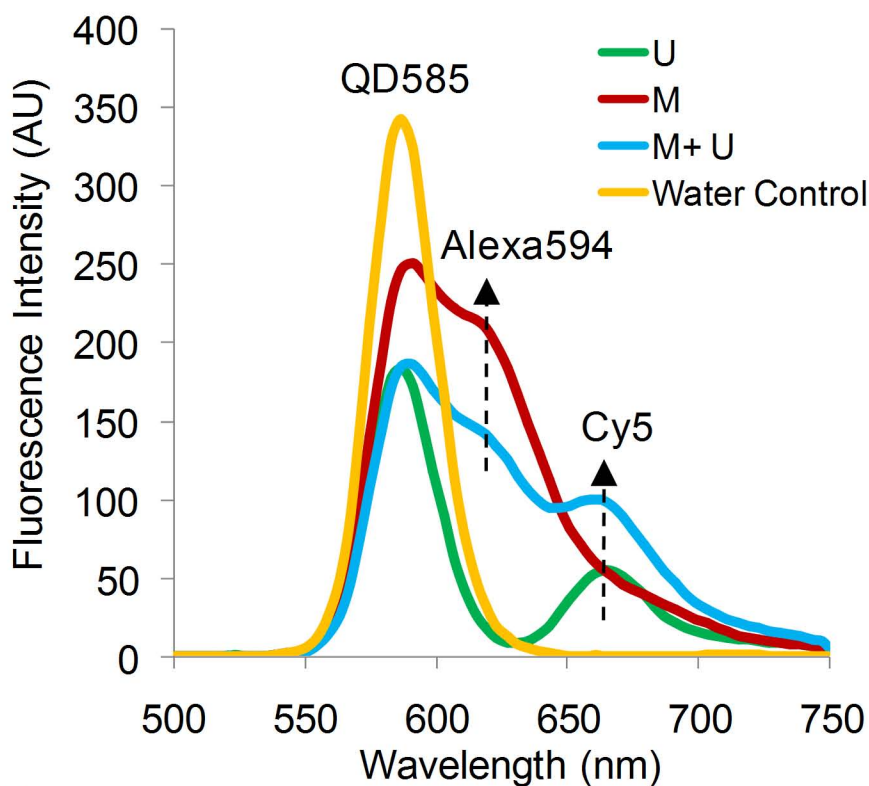

B

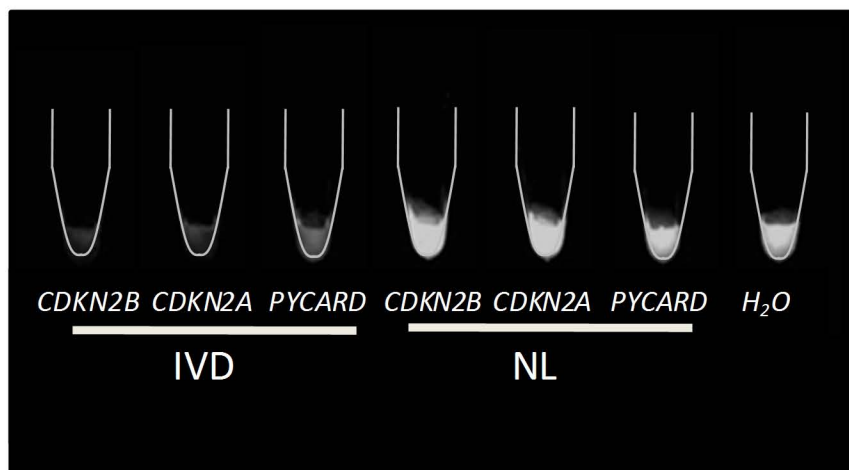

Bailey\_Supplementary Figure 3

**A****CDKN2b**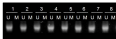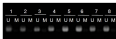**CDKN2a**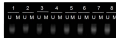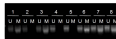**B**

Patient PYCARD CDKN2b CDKN2a

|    |   |   |   |
|----|---|---|---|
| 1  | U | U | M |
| 2  | U | U | U |
| 3  | M | U | M |
| 4  | U | U | U |
| 5  | U | U | U |
| 6  | U | U | M |
| 7  | M | U | M |
| 8  | M | U | M |
| 9  | U | U | U |
| 10 | U | U | M |
| 11 | U | U | U |
| 12 | U | U | M |
| 13 | U | U | M |
| 14 | U | U | M |
| 15 | U | U | U |
| 16 | U | U | M |
| 17 | U | U | M |
| 18 | U | U | U |
| 19 | U | U | M |
| 20 | U | U | U |
